# Supplementary material for: Reproductive pattern in the solanum mealybug, Phenacoccus solani: A new perspective
Source: PeerJ. 2020 Aug 25;8:e9734. doi: 10.7717/peerj.9734 (PMC7453925; doi:10.7717/peerj.9734)
Supplement: Supplemental Information 1 [file peerj-08-9734-s001.xlsx]

## Sheet: Fig1
Test serial number	the thickness of female adults
1	0.92
2	0.91
3	0.74
4	0.84
5	0.86
6	0.75
7	0.88
8	0.74
9	0.91
10	0.87
11	0.95
12	0.86
13	1.02
14	0.76
15	1.12
16	0.86
17	0.84
18	1
19	0.83
20	0.84
21	0.91
22	0.94
23	0.99
24	0.85
25	0.91
26	0.95
27	0.94
28	1.07
29	1.08
30	1.02
31	0.99
32	1.02

## Sheet: Fig4
on leaves
serial number	with eyespots	without eyespots
1	12	3
2	9	1
3	15	0
4	6	2
5	7	2
6	10	0
7	17	4
8	14	3
9	8	0
10	8	0
11	12	2
12	5	1
13	7	4
14	10	1
15	10	0
on concave slide
serial number	with eyespots	without eyespots
1	7	1
2	14	1
3	8	2
4	11	0
5	7	1
6	9	0
7	13	2
8	7	1
9	16	3
10	8	0
11	6	2
12	8	0
13	11	1
14	8	0
15	10	0
The length of two types of eggs
serial number	with eyespots	without eyespots
1	351.26	365.33
2	351.38	326.05
3	335.54	287.41
4	362.63	309.35
5	306.92	375.38
6	363.99	313.57
7	338.83	300.01
8	340.15	289.51
9	325.3	261.7
10	318.03	233.6
11	336.7	279.92
12	352.21	266.42
13	309.21	294.74
14	285.58	242.88
15	311.32	260.9
16	289.64	333.69
17	297.72	253.25
18	304.82	264.68
19	299.73	328.56
20	282.31	355.13
21	252.52	347.93
22	261.18	310.43
23	358.35	345.89
24	320.61	317.58
25	332.51	361.39
The length (C) and width (D) of two types of eggs
serial number	with eyespots	without eyespots
1	144.2	154.14
2	162.48	114.09
3	160.39	155.09
4	145.65	128.57
5	145.87	146.33
6	152.34	166.55
7	143.61	168.94
8	153.41	132.01
9	143.19	155.65
10	138.45	150.45
11	156.31	124.96
12	129.89	153.48
13	133.55	155.92
14	151.82	142.38
15	160.02	137.37
16	139.69	166.32
17	144.23	127.31
18	141.17	142.06
19	128.6	162.05
20	162.11	136.66
21	150.43	141.07
22	137.94	158.93
23	130.94	162.37
24	148.33	137.32
25	141.08	152.17

## Sheet: Fig5
Hatching time of eggs without the mother’s body or in isolation
serial number	Period of time	time
1	10:13-10:33	20min
2	10：58-11：20	22min
3	14：50-15：10	20min
4	15：08-15：28	20min
5	10:22-10:43	21min
6	10:45-11:05	20min
7	11:31-11:53	22min
8	15:04-15:24	20min
9	15:16-15:37	21min
10	16:18-16:37	19min
11	19：42-20：04	22min
12	20：09-20：30	21min
13	21：11-21：29	18min
14	21：48-22：08	20min
15	9：52-10：09	17min
16	10：29-10：57	28min
17	10：48-11：11	23min
18	11：15-11：30	15min
19	11：19-11：45	26min
20	15：33-15：51	18min
21	15：54-16：13	19min
22	16：04-16：24	20min
23	16：29-16：52	23min
24	16：32-16：43	11min
25	16：53-17：11	18min
26	17：03-17：23	20min
27	9：35-9：58	23min
28	9：48-10：08	20min
29	9：52-10：12	20min
30	10：27-10：43	16min
31	10：27-10：45	18min
32	14：23-14：42	19min
33	14：31-14：54	23min
34	15：18-15：34	16min
35	15：21-15：42	21min
36	16：22-16：37	15min
37	9：07-9：28	21min
38	9：14-9：30	16min
39	9：30-9:49	19min
40	9:49-10:08	19min
41	10:05-10:25	20min
42	10:10-10:24	14min
43	10:12-10:34	22min
44	10:36-10:55	19min
45	10:44-10:57	13min
46	10:48-11:06	18min
47	11:06-11:25	19min
Hatching time of eggs beneath the abdomen of adult female
serial number	Period of time	time
1	09：50-10：20	30min
2	10：50-11：11	21min
3	11：33-11：53	20min
4	14：06-14：32	26min
5	14：54-15：24	30min
6	15：58-16：30	32min
7	09：31-09：57	26min
8	09：43-10：09	26min
9	10：33-10：54	21min
10	15：35-15：58	23min
11	16：25-16：50	25min
12	10：15-10：40	25min
13	13：45-14：06	21min
14	14：56-15：20	24min
15	17：13-17：40	27min
16	17：59-18：20	31min
17	15：08-15：30	22min
18	16：03-16：27	24min
19	16：24-16：29	25min
20	17：03-17：26	23min
21	20：01-20：24	23min
22	19：17-19：38	21min
23	19：40-20：05	25min
24	20：04-20：23	19min
25	20：49-21：13	24min
26	10：29-10：52	23min
27	14：28-14：50	22min
28	15：58-16：20	22min
29	17：16-17：42	26min
30	17：35-17：57	22min
